# Supplementary material
Source: PubMed Central journal article supplement (PMC4309978)
Supplement: NIHMS655013-supplement.pdf [file NIHMS655013-supplement.pdf]

## Item Key

### Sample 1: GENES

| Label  | Item                                                                                                                                |
|--------|-------------------------------------------------------------------------------------------------------------------------------------|
| zkpq1  | I tend to begin a new job without much advance planning on how I will do it.                                                        |
| zkpq2  | I usually think about what I am going to do before doing it.                                                                        |
| zkpq3  | I often do things on impulse.                                                                                                       |
| zkpq4  | I very seldom spend much time on the details of planning ahead.                                                                     |
| zkpq5  | I like to have new and exciting experiences and sensations, even if they are a little frightening.                                  |
| zkpq6  | Before I begin a complicated job, I make careful plans.                                                                             |
| zkpq7  | I would like to take off on a trip with no preplanned or definite routes or timetables.                                             |
| zkpq8  | I enjoy getting into new situations where you can't predict how things will turn out                                                |
| zkpq9  | I like doing things just for the thrill of it.                                                                                      |
| zkpq10 | I tend to change interests frequently.                                                                                              |
| zkpq11 | I sometimes like to do things that are a little frightening.                                                                        |
| zkpq12 | I'll try anything once.                                                                                                             |
| zkpq13 | I would like the kind of life where one is on the move and traveling a lot, with lots of change and excitement.                     |
| zkpq14 | I sometimes do "crazy" things just for fun.                                                                                         |
| zkpq15 | I like to explore a strange city or section of town by myself, even if it means getting lost.                                       |
| zkpq16 | I prefer friends who are so excitingly unpredictable.                                                                               |
| zkpq17 | I often get so carried away by new and exciting things and ideas that I never think of possible complications.                      |
| zkpq18 | I am an impulsive person.                                                                                                           |
| zkpq19 | I like wild "uninhibited" parties.                                                                                                  |
| tpq29  | I often do things based on how I feel at the moment, without thinking about how they were done in the past.                         |
| tpq31  | I often break rules and regulations when I think I can get away with it.                                                            |
| tpq35  | It is difficult for me to keep the same interests for a long time because my attention often shifts to something else               |
| tpq37  | I often follow my instincts, hunches, or intuition, without thinking through all the details.                                       |
| tpq39  | I usually think about all the facts in detail before I make a decision.                                                             |
| tpq40  | I <u>nearly always</u> think about all the facts in detail before I make a decision, even when other people demand a quick decision |
| tpq44  | I can usually do a good job of stretching the truth to tell a funnier story or to play a joke on someone.                           |
| tpq54  | I hate to make decisions based only on my first impressions.                                                                        |
| tpq63  | I like to pay close attention to details in everything I do.                                                                        |

### Sample 2: Add Health

| Label        | Item                                                                                                                                                                              |
|--------------|-----------------------------------------------------------------------------------------------------------------------------------------------------------------------------------|
| sexual abuse | How often had one of your parents or other adult care-givers touched you in a sexual way, forced you to touch him or her in a sexual way, or forced you to have sexual relations? |
| gut          | You go with your "gut feeling" and don't think much about the consequences about each alternative                                                                                 |
| risk         | You like to take risks                                                                                                                                                            |
| fore         | You live your life without much thought for the future                                                                                                                            |
| fcrowd       | In social situations you tend not to follow the crowd, but instead behave in a way that suits your mood at the time                                                               |
| conform      | Your behavior often depends on how you think other people want you to behave                                                                                                      |
| conscie      | I am conscientious                                                                                                                                                                |
| reliab       | I am reliable                                                                                                                                                                     |
| risk2_h      | I am willing to take risks                                                                                                                                                        |
| tact         | I am tactful                                                                                                                                                                      |
| agg          | I am aggressive                                                                                                                                                                   |
| gentle       | I am gentle                                                                                                                                                                       |
| cnvntnl      | I am conventional                                                                                                                                                                 |
| qparty       | I like wild uninhibited parties versus I like quiet parties with good conversation                                                                                                |

|          |                                                                                                                                                                                                           |
|----------|-----------------------------------------------------------------------------------------------------------------------------------------------------------------------------------------------------------|
| expseek  | I am not interested in experience for its own sake <i>versus</i> I like to have new and exciting experiences and sensations even if they are a little frightening, unconventional, or illegal             |
| date_v   | I like to date ppl who are physically exciting <i>versus</i> I like to date people who share my values                                                                                                    |
| td_mrrg  | A person should have considerable sexual experience before marriage <i>versus</i> It's better if two married ppl begin their sexual experience with each other                                            |
| jetset   | Even if I had the money I would not want to fly around the world and have fun like some rich ppl do <i>versus</i> If I had lots of money I would fly around the world and have fun like some rich ppl do. |
| thrill   | I often try new things just for the fun or thrills <i>versus</i> even if most people think they are a waste of time                                                                                       |
| excit    | When nothing new is happening I usually start looking for something exciting                                                                                                                              |
| glib     | I can usually get ppl to believe me, even when what I'm saying isn't quite true                                                                                                                           |
| whim     | I often do things based on how I feel at the moment                                                                                                                                                       |
| lctrl    | I sometimes get so excited I lose control of myself                                                                                                                                                       |
| lax      | I like it when people can do whatever they want, without strict rules and regulations                                                                                                                     |
| instinct | I often follow my instincts, without thinking through all the details                                                                                                                                     |
| struth   | I can do a good job of "stretching the truth" when I'm talking to people                                                                                                                                  |

Wave 1.

|           | SEXUAL ABUSE | DRD4-7 | ETHNICITY | ZKPQ1_1 | ZKPQ2_1 | ZKPQ3_1 | ZKPQ4_1 | ZKPQ5_1 | ZKPQ6_1 | ZKPQ8_1 | ZKPQ9_1 | ZKPQ11_1 | ZKPQ12_1 | ZKPQ13_1 | ZKPQ14_1 | ZKPQ15_1 |
|-----------|--------------|--------|-----------|---------|---------|---------|---------|---------|---------|---------|---------|----------|----------|----------|----------|----------|
| DRD4-7    | 0.11         |        |           |         |         |         |         |         |         |         |         |          |          |          |          |          |
| ETHNICITY | 0.06         | 0.16   |           |         |         |         |         |         |         |         |         |          |          |          |          |          |
| ZKPQ1_1   | -0.03        | -0.08  | 0.03      |         |         |         |         |         |         |         |         |          |          |          |          |          |
| ZKPQ2_1   | 0.21         | -0.12  | 0.01      | -0.52   |         |         |         |         |         |         |         |          |          |          |          |          |
| ZKPQ3_1   | -0.20        | 0.06   | -0.02     | 0.40    | -0.70   |         |         |         |         |         |         |          |          |          |          |          |
| ZKPQ4_1   | -0.13        | 0.09   | 0.03      | 0.46    | -0.57   | 0.48    |         |         |         |         |         |          |          |          |          |          |
| ZKPQ5_1   | -0.12        | -0.04  | -0.03     | 0.20    | -0.19   | 0.42    | 0.14    |         |         |         |         |          |          |          |          |          |
| ZKPQ6_1   | 0.08         | -0.08  | 0.14      | -0.41   | 0.51    | -0.44   | -0.48   | -0.10   |         |         |         |          |          |          |          |          |
| ZKPQ8_1   | -0.05        | 0.08   | 0.08      | 0.29    | -0.44   | 0.50    | 0.39    | 0.51    | -0.43   |         |         |          |          |          |          |          |
| ZKPQ9_1   | -0.05        | 0.04   | 0.02      | 0.11    | -0.43   | 0.46    | 0.13    | 0.63    | -0.27   | 0.55    |         |          |          |          |          |          |
| ZKPQ11_1  | -0.04        | 0.01   | -0.14     | 0.21    | -0.21   | 0.30    | 0.11    | 0.66    | -0.22   | 0.40    | 0.59    |          |          |          |          |          |
| ZKPQ12_1  | -0.25        | -0.06  | 0.05      | 0.06    | -0.12   | 0.18    | -0.08   | 0.42    | -0.07   | 0.22    | 0.29    | 0.31     |          |          |          |          |
| ZKPQ13_1  | -0.16        | -0.01  | 0.00      | 0.08    | -0.24   | 0.21    | -0.01   | 0.34    | -0.19   | 0.33    | 0.25    | 0.26     | 0.44     |          |          |          |
| ZKPQ14_1  | 0.00         | 0.08   | -0.07     | 0.30    | -0.30   | 0.41    | 0.09    | 0.52    | -0.09   | 0.32    | 0.61    | 0.44     | 0.26     | 0.21     |          |          |
| ZKPQ15_1  | -0.11        | -0.06  | -0.02     | 0.20    | -0.17   | 0.26    | 0.11    | 0.30    | -0.12   | 0.39    | 0.20    | 0.26     | 0.17     | 0.19     | 0.23     |          |
| ZKPQ16_1  | -0.03        | -0.01  | -0.02     | 0.23    | -0.22   | 0.23    | 0.12    | 0.44    | -0.15   | 0.38    | 0.43    | 0.37     | 0.30     | 0.31     | 0.34     | 0.26     |
| ZKPQ17_1  | -0.17        | 0.09   | 0.02      | 0.32    | -0.32   | 0.48    | 0.26    | 0.37    | -0.27   | 0.44    | 0.45    | 0.25     | 0.22     | 0.31     | 0.37     | 0.26     |
| ZKPQ18_1  | -0.30        | 0.08   | 0.00      | 0.32    | -0.62   | 0.82    | 0.41    | 0.49    | -0.41   | 0.53    | 0.46    | 0.38     | 0.29     | 0.24     | 0.43     | 0.29     |
| ZKPQ19_1  | -0.13        | 0.05   | 0.09      | 0.29    | -0.33   | 0.28    | 0.26    | 0.36    | -0.15   | 0.31    | 0.47    | 0.44     | 0.31     | 0.29     | 0.45     | 0.18     |
| TPQ29_1   | -0.10        | 0.03   | 0.13      | 0.32    | -0.47   | 0.42    | 0.35    | 0.32    | -0.18   | 0.44    | 0.26    | 0.13     | 0.26     | 0.23     | 0.24     | 0.20     |
| TPQ31_1   | -0.08        | 0.02   | 0.11      | 0.16    | -0.25   | 0.26    | 0.22    | 0.18    | -0.21   | 0.22    | 0.31    | 0.26     | 0.22     | 0.17     | 0.30     | 0.23     |
| TPQ35_1   | -0.10        | 0.03   | 0.01      | 0.24    | -0.28   | 0.32    | 0.20    | 0.32    | -0.26   | 0.31    | 0.29    | 0.26     | 0.29     | 0.29     | 0.22     | 0.13     |
| TPQ37_1   | -0.09        | 0.01   | -0.01     | 0.26    | -0.33   | 0.48    | 0.23    | 0.29    | -0.35   | 0.38    | 0.31    | 0.30     | 0.22     | 0.27     | 0.27     | 0.35     |
| TPQ39_1   | 0.07         | -0.07  | 0.07      | -0.24   | 0.61    | -0.51   | -0.41   | -0.28   | 0.43    | -0.43   | -0.18   | -0.26    | -0.09    | -0.05    | -0.22    | -0.18    |
| TPQ40_1   | 0.10         | -0.02  | 0.15      | -0.21   | 0.56    | -0.43   | -0.29   | -0.27   | 0.45    | -0.30   | -0.23   | -0.24    | -0.12    | -0.09    | -0.13    | -0.03    |
| TPQ44_1   | 0.07         | -0.04  | 0.03      | 0.11    | -0.11   | 0.20    | 0.13    | 0.10    | -0.01   | 0.21    | 0.27    | 0.12     | -0.02    | 0.01     | 0.32     | 0.00     |
| TPQ54_1   | 0.16         | 0.06   | 0.07      | -0.03   | 0.26    | -0.19   | -0.07   | -0.10   | 0.25    | -0.17   | -0.10   | -0.15    | 0.07     | 0.01     | -0.08    | -0.04    |
| TPQ63_1   | 0.04         | -0.05  | 0.00      | -0.29   | 0.45    | -0.33   | -0.51   | -0.07   | 0.44    | -0.27   | -0.17   | -0.09    | -0.05    | -0.06    | -0.13    | 0.06     |
| SES       | -0.05        | -0.02  | 0.15      | 0.05    | 0.01    | -0.06   | 0.04    | -0.05   | 0.04    | 0.04    | -0.11   | -0.12    | 0.12     | 0.05     | -0.07    | -0.04    |
| GENDER    | 0.54         | 0.01   | 0.13      | 0.32    | -0.05   | 0.01    | 0.16    | 0.10    | -0.05   | 0.30    | 0.19    | 0.28     | -0.089   | 0.04     | 0.15     | 0.27     |

ZKPQ16\_1 ZKPQ17\_1 ZKPQ18\_1 ZKPQ19\_1 TPQ29\_1 TPQ31\_1 TPQ35\_1 TPQ37\_1 TPQ39\_1 TPQ40\_1 TPQ44\_1 TPQ54\_1 TPQ\_63 SES

|       |       |       |       |       |       |       |       |       |       |        |        |      |       |  |
|-------|-------|-------|-------|-------|-------|-------|-------|-------|-------|--------|--------|------|-------|--|
| 0.43  |       |       |       |       |       |       |       |       |       |        |        |      |       |  |
| 0.32  | 0.62  |       |       |       |       |       |       |       |       |        |        |      |       |  |
| 0.36  | 0.39  | 0.30  |       |       |       |       |       |       |       |        |        |      |       |  |
| 0.35  | 0.55  | 0.50  | 0.36  |       |       |       |       |       |       |        |        |      |       |  |
| 0.30  | 0.25  | 0.26  | 0.35  | 0.37  |       |       |       |       |       |        |        |      |       |  |
| 0.40  | 0.41  | 0.38  | 0.22  | 0.40  | 0.24  |       |       |       |       |        |        |      |       |  |
| 0.42  | 0.41  | 0.44  | 0.31  | 0.39  | 0.28  | 0.39  |       |       |       |        |        |      |       |  |
| -0.23 | -0.31 | -0.45 | -0.17 | -0.46 | -0.03 | -0.20 | -0.43 |       |       |        |        |      |       |  |
| -0.14 | -0.27 | -0.36 | -0.15 | -0.37 | -0.23 | -0.18 | -0.31 | 0.72  |       |        |        |      |       |  |
| 0.07  | 0.24  | 0.12  | 0.11  | 0.11  | 0.20  | 0.17  | 0.19  | -0.11 | -0.11 |        |        |      |       |  |
| 0.06  | -0.11 | -0.21 | -0.16 | -0.06 | -0.09 | 0.09  | -0.25 | 0.23  | 0.18  | -0.13  |        |      |       |  |
| -0.10 | -0.32 | -0.37 | -0.18 | -0.39 | -0.14 | -0.26 | -0.32 | 0.67  | 0.51  | -0.11  | 0.17   |      |       |  |
| -0.03 | 0.04  | 0.07  | 0.07  | 0.15  | 0.02  | 0.03  | 0.07  | -0.02 | 0.09  | -0.109 | -0.033 | 1.79 |       |  |
| 0.05  | 0.14  | -0.08 | 0.22  | 0.11  | 0.14  | 0.04  | 0.03  | 0.07  | 0.14  | 0.23   | -0.04  | 0.08 | -0.13 |  |

Wave 8.

|           | SEXUAL ABUSE | DRD4-7 | ETHNICITY | ZKPQ1_8 | ZKPQ2_8 | ZKPQ3_8 | ZKPQ4_8 | ZKPQ5_8 | ZKPQ6_8 | ZKPQ8_8 | ZKPQ9_8 | ZKPQ11_8 | ZKPQ12_8 | ZKPQ13_8 | ZKPQ14_8 |
|-----------|--------------|--------|-----------|---------|---------|---------|---------|---------|---------|---------|---------|----------|----------|----------|----------|
| DRD4-7    | 0.11         |        |           |         |         |         |         |         |         |         |         |          |          |          |          |
| ETHNICITY | 0.06         | 0.16   |           |         |         |         |         |         |         |         |         |          |          |          |          |
| ZKPQ1_8   | 0.02         | 0.03   | 0.16      |         |         |         |         |         |         |         |         |          |          |          |          |
| ZKPQ2_8   | -0.10        | -0.09  | -0.07     | -0.60   |         |         |         |         |         |         |         |          |          |          |          |
| ZKPQ3_8   | -0.04        | -0.02  | -0.05     | 0.37    | -0.63   |         |         |         |         |         |         |          |          |          |          |
| ZKPQ4_8   | 0.07         | 0.05   | 0.04      | 0.40    | -0.50   | 0.40    |         |         |         |         |         |          |          |          |          |
| ZKPQ5_8   | -0.10        | 0.15   | -0.13     | 0.06    | -0.06   | 0.43    | 0.15    |         |         |         |         |          |          |          |          |
| ZKPQ6_8   | 0.18         | 0.02   | 0.01      | -0.40   | 0.55    | -0.46   | -0.49   | -0.12   |         |         |         |          |          |          |          |
| ZKPQ8_8   | -0.11        | 0.03   | -0.17     | 0.22    | -0.29   | 0.49    | 0.27    | 0.56    | -0.40   |         |         |          |          |          |          |
| ZKPQ9_8   | -0.12        | 0.15   | -0.02     | 0.08    | -0.23   | 0.48    | 0.14    | 0.73    | -0.28   | 0.57    |         |          |          |          |          |
| ZKPQ11_8  | -0.04        | 0.07   | -0.14     | 0.10    | -0.27   | 0.21    | 0.07    | 0.65    | -0.02   | 0.46    | 0.53    |          |          |          |          |
| ZKPQ12_8  | -0.28        | 0.09   | 0.11      | 0.09    | -0.04   | 0.24    | -0.03   | 0.44    | -0.16   | 0.30    | 0.40    | 0.32     |          |          |          |
| ZKPQ13_8  | -0.23        | -0.01  | 0.01      | 0.31    | -0.17   | 0.37    | 0.23    | 0.40    | -0.20   | 0.46    | 0.38    | 0.30     | 0.45     |          |          |
| ZKPQ14_8  | -0.07        | 0.01   | -0.05     | 0.03    | -0.12   | 0.44    | 0.24    | 0.64    | -0.07   | 0.41    | 0.74    | 0.50     | 0.35     | 0.39     |          |
| ZKPQ15_8  | -0.21        | 0.11   | -0.10     | 0.21    | -0.02   | 0.32    | 0.07    | 0.49    | -0.14   | 0.53    | 0.37    | 0.29     | 0.26     | 0.42     | 0.38     |
| ZKPQ16_8  | -0.09        | 0.10   | 0.02      | 0.12    | -0.13   | 0.35    | 0.09    | 0.57    | -0.18   | 0.43    | 0.49    | 0.37     | 0.38     | 0.48     | 0.61     |
| ZKPQ17_8  | -0.11        | 0.05   | 0.16      | 0.20    | -0.24   | 0.58    | 0.22    | 0.44    | -0.40   | 0.56    | 0.50    | 0.27     | 0.29     | 0.54     | 0.43     |
| ZKPQ18_8  | -0.13        | -0.03  | -0.07     | 0.39    | -0.61   | 0.83    | 0.38    | 0.36    | -0.53   | 0.53    | 0.51    | 0.30     | 0.32     | 0.53     | 0.43     |
| ZKPQ19_8  | -0.05        | -0.02  | -0.03     | 0.23    | -0.21   | 0.31    | 0.18    | 0.38    | -0.26   | 0.36    | 0.41    | 0.40     | 0.28     | 0.39     | 0.46     |
| TPQ29_8   | -0.04        | 0.03   | 0.08      | 0.38    | -0.47   | 0.57    | 0.44    | 0.29    | -0.24   | 0.44    | 0.32    | 0.29     | 0.09     | 0.39     | 0.34     |
| TPQ31_8   | -0.11        | -0.09  | -0.06     | 0.19    | -0.31   | 0.41    | 0.19    | 0.30    | -0.28   | 0.46    | 0.48    | 0.27     | 0.20     | 0.29     | 0.38     |
| TPQ35_8   | -0.10        | 0.09   | 0.08      | 0.14    | -0.33   | 0.48    | 0.10    | 0.32    | -0.41   | 0.27    | 0.33    | 0.19     | 0.24     | 0.36     | 0.25     |
| TPQ37_8   | -0.17        | -0.03  | 0.02      | 0.41    | -0.48   | 0.51    | 0.37    | 0.28    | -0.45   | 0.46    | 0.35    | 0.23     | 0.22     | 0.29     | 0.33     |
| TPQ39_8   | 0.02         | -0.08  | 0.04      | -0.41   | 0.70    | -0.45   | -0.48   | -0.12   | 0.61    | -0.25   | -0.11   | 0.01     | 0.01     | -0.22    | -0.04    |
| TPQ40_8   | 0.19         | 0.02   | 0.02      | -0.22   | 0.57    | -0.37   | -0.21   | -0.05   | 0.38    | -0.27   | -0.12   | -0.17    | -0.07    | -0.22    | -0.11    |
| TPQ44_8   | -0.03        | -0.04  | -0.02     | 0.07    | -0.12   | 0.30    | -0.05   | 0.18    | 0.01    | 0.12    | 0.29    | 0.16     | 0.16     | 0.14     | 0.28     |
| TPQ54_8   | 0.03         | 0.05   | -0.02     | -0.21   | 0.07    | -0.22   | 0.03    | -0.01   | 0.11    | 0.03    | 0.12    | 0.08     | 0.01     | 0.05     | 0.06     |
| TPQ63_8   | 0.02         | -0.06  | 0.07      | -0.37   | 0.46    | -0.39   | -0.32   | -0.03   | 0.42    | -0.32   | -0.08   | -0.09    | 0.06     | -0.09    | -0.08    |
| SES       | -0.05        | -0.02  | 0.15      | 0.19    | -0.13   | -0.11   | 0.05    | -0.10   | 0.00    | -0.03   | -0.10   | -0.03    | -0.01    | 0.08     | -0.12    |
| GENDER    | 0.54         | 0.01   | 0.13      | 0.06    | -0.09   | 0.01    | 0.17    | 0.04    | -0.08   | 0.16    | 0.11    | 0.23     | -0.16    | -0.07    | 0.02     |

ZKPQ15\_8 ZKPQ16\_8 ZKPQ17\_8 ZKPQ18\_8 ZKPQ19\_8 TPQ29\_8 TPQ31\_8 TPQ35\_8 TPQ37\_8 TPQ39\_8 TPQ40\_8 TPQ44\_8 TPQ54\_8 TPQ63\_8 SES

|       |      |       |       |       |       |       |       |       |       |      |       |       |       |       |  |
|-------|------|-------|-------|-------|-------|-------|-------|-------|-------|------|-------|-------|-------|-------|--|
| 0.46  |      |       |       |       |       |       |       |       |       |      |       |       |       |       |  |
| 0.54  | 0.57 |       |       |       |       |       |       |       |       |      |       |       |       |       |  |
| 0.37  | 0.45 | 0.72  |       |       |       |       |       |       |       |      |       |       |       |       |  |
| 0.29  | 0.46 | 0.45  | 0.43  |       |       |       |       |       |       |      |       |       |       |       |  |
| 0.30  | 0.32 | 0.64  | 0.61  | 0.40  |       |       |       |       |       |      |       |       |       |       |  |
| 0.21  | 0.41 | 0.29  | 0.50  | 0.42  | 0.43  |       |       |       |       |      |       |       |       |       |  |
| 0.25  | 0.46 | 0.44  | 0.54  | 0.28  | 0.43  | 0.32  |       |       |       |      |       |       |       |       |  |
| 0.23  | 0.28 | 0.46  | 0.63  | 0.33  | 0.63  | 0.47  | 0.37  |       |       |      |       |       |       |       |  |
| -0.09 | 0.04 | -0.22 | -0.48 | -0.19 | -0.45 | -0.27 | -0.18 | -0.56 |       |      |       |       |       |       |  |
| -0.05 | 0.01 | -0.10 | -0.42 | -0.22 | -0.21 | -0.14 | -0.22 | -0.41 | 0.59  |      |       |       |       |       |  |
| 0.16  | 0.16 | 0.16  | 0.08  | 0.18  | 0.14  | 0.37  | 0.18  | 0.15  | -0.05 | 0.03 |       |       |       |       |  |
| 0.11  | 0.05 | -0.02 | -0.04 | -0.04 | -0.02 | -0.06 | 0.04  | -0.20 | 0.17  | 0.20 | -0.10 |       |       |       |  |
| -0.15 | 0.01 | -0.12 | -0.32 | -0.02 | -0.25 | -0.27 | -0.12 | -0.56 | 0.60  | 0.45 | -0.21 | 0.19  |       |       |  |
| -0.11 | 0.00 | 0.15  | -0.07 | 0.05  | 0.15  | -0.03 | 0.03  | 0.16  | -0.08 | 0.00 | -0.09 | -0.07 | -0.04 |       |  |
| 0.02  | 0.02 | 0.09  | 0.06  | 0.23  | 0.12  | 0.32  | 0.06  | 0.09  | -0.07 | 0.03 | 0.26  | 0.09  | -0.03 | -0.13 |  |

Wave 9.

|           | SEXUAL ABUSE | DRD4-7 | ETHNICITY | ZKPQ1_9 | ZKPQ2_9 | ZKPQ3_9 | ZKPQ4_9 | ZKPQ5_9 | ZKPQ6_9 | ZKPQ8_9 | ZKPQ9_9 | ZKPQ11_9 | ZKPQ12_9 | ZKPQ13_9 | ZKPQ14_9 | ZKPQ15_9 |
|-----------|--------------|--------|-----------|---------|---------|---------|---------|---------|---------|---------|---------|----------|----------|----------|----------|----------|
| DRD4-7    | 0.11         |        |           |         |         |         |         |         |         |         |         |          |          |          |          |          |
| ETHNICITY | 0.06         | 0.16   |           |         |         |         |         |         |         |         |         |          |          |          |          |          |
| ZKPQ1_9   | -0.04        | -0.02  | 0.04      |         |         |         |         |         |         |         |         |          |          |          |          |          |
| ZKPQ2_9   | 0.14         | -0.01  | -0.21     | -0.47   |         |         |         |         |         |         |         |          |          |          |          |          |
| ZKPQ3_9   | -0.16        | 0.06   | 0.07      | 0.40    | -0.66   |         |         |         |         |         |         |          |          |          |          |          |
| ZKPQ4_9   | -0.01        | 0.06   | 0.16      | 0.65    | -0.67   | 0.44    |         |         |         |         |         |          |          |          |          |          |
| ZKPQ5_9   | -0.16        | -0.05  | 0.05      | 0.02    | -0.19   | 0.35    | 0.30    |         |         |         |         |          |          |          |          |          |
| ZKPQ6_9   | 0.10         | -0.06  | 0.04      | -0.52   | 0.51    | -0.33   | -0.45   | -0.04   |         |         |         |          |          |          |          |          |
| ZKPQ8_9   | -0.06        | 0.05   | -0.03     | 0.27    | -0.16   | 0.38    | 0.42    | 0.62    | -0.14   |         |         |          |          |          |          |          |
| ZKPQ9_9   | -0.04        | 0.11   | 0.04      | 0.17    | -0.15   | 0.39    | 0.37    | 0.62    | -0.05   | 0.63    |         |          |          |          |          |          |
| ZKPQ11_9  | -0.14        | -0.07  | -0.01     | 0.21    | -0.07   | 0.32    | 0.22    | 0.69    | 0.00    | 0.50    | 0.50    |          |          |          |          |          |
| ZKPQ12_9  | -0.20        | 0.04   | 0.17      | 0.14    | -0.07   | 0.22    | 0.26    | 0.49    | 0.10    | 0.31    | 0.36    | 0.37     |          |          |          |          |
| ZKPQ13_9  | -0.02        | -0.01  | 0.06      | 0.22    | -0.14   | 0.33    | 0.46    | 0.56    | -0.14   | 0.55    | 0.43    | 0.38     | 0.37     |          |          |          |
| ZKPQ14_9  | -0.13        | 0.02   | 0.02      | 0.35    | -0.23   | 0.37    | 0.35    | 0.55    | -0.21   | 0.47    | 0.54    | 0.56     | 0.31     | 0.41     |          |          |
| ZKPQ15_9  | -0.08        | 0.01   | -0.13     | 0.21    | -0.19   | 0.35    | 0.39    | 0.41    | -0.10   | 0.63    | 0.41    | 0.38     | 0.21     | 0.51     | 0.41     |          |
| ZKPQ16_9  | 0.01         | -0.06  | 0.06      | 0.30    | -0.32   | 0.29    | 0.29    | 0.46    | -0.07   | 0.50    | 0.57    | 0.39     | 0.25     | 0.48     | 0.54     | 0.39     |
| ZKPQ17_9  | -0.02        | 0.06   | 0.07      | 0.39    | -0.51   | 0.59    | 0.48    | 0.47    | -0.32   | 0.43    | 0.38    | 0.34     | 0.25     | 0.45     | 0.55     | 0.40     |
| ZKPQ18_9  | -0.19        | 0.05   | 0.01      | 0.34    | -0.47   | 0.80    | 0.56    | 0.43    | -0.27   | 0.47    | 0.50    | 0.34     | 0.28     | 0.45     | 0.54     | 0.41     |
| ZKPQ19_9  | -0.03        | 0.01   | 0.11      | 0.25    | -0.35   | 0.42    | 0.36    | 0.47    | -0.11   | 0.39    | 0.53    | 0.36     | 0.44     | 0.28     | 0.53     | 0.31     |
| TPQ29_9   | -0.25        | -0.03  | 0.11      | 0.37    | -0.36   | 0.52    | 0.43    | 0.26    | -0.19   | 0.35    | 0.46    | 0.32     | 0.35     | 0.43     | 0.54     | 0.24     |
| TPQ31_9   | -0.12        | -0.04  | 0.01      | 0.35    | -0.22   | 0.45    | 0.40    | 0.51    | -0.24   | 0.36    | 0.36    | 0.42     | 0.30     | 0.33     | 0.38     | 0.22     |
| TPQ35_9   | -0.15        | -0.07  | 0.03      | 0.19    | -0.22   | 0.44    | 0.29    | 0.44    | -0.07   | 0.26    | 0.40    | 0.26     | 0.31     | 0.39     | 0.34     | 0.20     |
| TPQ37_9   | -0.14        | -0.01  | 0.03      | 0.48    | -0.50   | 0.51    | 0.54    | 0.37    | -0.36   | 0.30    | 0.35    | 0.35     | 0.31     | 0.33     | 0.47     | 0.17     |
| TPQ39_9   | 0.15         | 0.00   | 0.04      | -0.39   | 0.59    | -0.31   | -0.41   | -0.17   | 0.53    | -0.25   | -0.12   | -0.11    | 0.00     | -0.16    | -0.22    | -0.01    |
| TPQ40_9   | 0.15         | 0.02   | 0.06      | -0.13   | 0.38    | -0.19   | -0.16   | -0.08   | 0.45    | -0.12   | -0.12   | -0.12    | 0.03     | -0.09    | -0.14    | 0.01     |
| TPQ44_9   | 0.10         | -0.06  | -0.04     | 0.21    | -0.01   | 0.15    | 0.06    | 0.18    | -0.06   | 0.15    | 0.30    | 0.22     | 0.11     | 0.11     | 0.13     | 0.12     |
| TPQ54_9   | 0.12         | 0.12   | 0.06      | -0.08   | 0.29    | -0.28   | 0.01    | 0.08    | 0.15    | -0.05   | -0.01   | 0.02     | -0.06    | -0.03    | -0.04    | 0.06     |
| TPQ63_9   | 0.08         | 0.07   | 0.03      | -0.36   | 0.50    | -0.31   | -0.44   | -0.05   | 0.55    | -0.27   | -0.24   | -0.04    | -0.10    | -0.22    | -0.26    | -0.12    |
| SES       | -0.05        | -0.02  | 0.15      | 0.03    | -0.11   | -0.09   | 0.01    | -0.07   | -0.11   | -0.05   | -0.04   | -0.07    | 0.01     | -0.01    | -0.02    | -0.08    |
| GENDER    | 0.54         | 0.01   | 0.13      | 0.18    | -0.01   | 0.10    | 0.20    | 0.10    | -0.11   | 0.26    | 0.25    | 0.28     | -0.08    | 0.15     | 0.17     | 0.23     |

ZKPQ16\_9 ZKPQ17\_9 ZKPQ18\_9 ZKPQ19\_9 TPQ29\_9 TPQ31\_9 TPQ35\_9 TPQ37\_9 TPQ39\_9 TPQ40\_9 TPQ44\_9 TPQ54\_9 TPQ63\_9 SES

|       |       |       |       |       |       |       |       |       |       |       |      |       |       |  |
|-------|-------|-------|-------|-------|-------|-------|-------|-------|-------|-------|------|-------|-------|--|
| 0.54  |       |       |       |       |       |       |       |       |       |       |      |       |       |  |
| 0.36  | 0.71  |       |       |       |       |       |       |       |       |       |      |       |       |  |
| 0.55  | 0.47  | 0.47  |       |       |       |       |       |       |       |       |      |       |       |  |
| 0.41  | 0.55  | 0.68  | 0.45  |       |       |       |       |       |       |       |      |       |       |  |
| 0.40  | 0.35  | 0.48  | 0.50  | 0.50  |       |       |       |       |       |       |      |       |       |  |
| 0.29  | 0.59  | 0.60  | 0.37  | 0.49  | 0.45  |       |       |       |       |       |      |       |       |  |
| 0.39  | 0.61  | 0.67  | 0.24  | 0.67  | 0.41  | 0.40  |       |       |       |       |      |       |       |  |
| -0.23 | -0.35 | -0.47 | -0.08 | -0.29 | -0.21 | -0.25 | -0.50 |       |       |       |      |       |       |  |
| -0.08 | -0.19 | -0.20 | -0.07 | -0.10 | -0.01 | -0.18 | -0.25 | 0.61  |       |       |      |       |       |  |
| 0.25  | 0.22  | 0.19  | 0.30  | 0.19  | 0.48  | 0.09  | 0.19  | 0.01  | 0.08  |       |      |       |       |  |
| -0.07 | -0.08 | -0.26 | 0.04  | -0.13 | -0.08 | 0.09  | -0.28 | 0.27  | 0.36  | -0.01 |      |       |       |  |
| -0.14 | -0.27 | -0.32 | -0.17 | -0.24 | -0.19 | -0.18 | -0.34 | 0.62  | 0.51  | -0.08 | 0.31 |       |       |  |
| 0.01  | -0.08 | -0.07 | 0.04  | 0.02  | -0.11 | -0.03 | -0.03 | -0.04 | -0.04 | -0.13 | 0.05 | -0.06 |       |  |
| 0.22  | 0.18  | 0.09  | 0.22  | 0.08  | 0.28  | 0.03  | -0.01 | 0.09  | 0.06  | 0.29  | 0.09 | -0.02 | -0.13 |  |



Wave 10.

|           | SEXUAL ABUSE | DRD4-7 | ETHNICITY | ZKPQ1 | ZKPQ2 | ZKPQ3 | ZKPQ4 | ZKPQ5 | ZKPQ6 | ZKPQ8 | ZKPQ9 | ZKPQ11 | ZKPQ12 | ZKPQ13 | ZKPQ14 | ZKPQ15 |
|-----------|--------------|--------|-----------|-------|-------|-------|-------|-------|-------|-------|-------|--------|--------|--------|--------|--------|
| DRD4-7    | 0.11         |        |           |       |       |       |       |       |       |       |       |        |        |        |        |        |
| ETHNICITY | 0.06         | 0.16   |           |       |       |       |       |       |       |       |       |        |        |        |        |        |
| ZKPQ1     | -0.05        | -0.10  | 0.01      |       |       |       |       |       |       |       |       |        |        |        |        |        |
| ZKPQ2     | 0.16         | 0.12   | 0.06      | -0.64 |       |       |       |       |       |       |       |        |        |        |        |        |
| ZKPQ3     | -0.06        | -0.02  | 0.00      | 0.54  | -0.71 |       |       |       |       |       |       |        |        |        |        |        |
| ZKPQ4     | -0.11        | -0.14  | -0.03     | 0.67  | -0.67 | 0.57  |       |       |       |       |       |        |        |        |        |        |
| ZKPQ5     | -0.20        | 0.05   | -0.01     | 0.26  | -0.17 | 0.30  | 0.19  |       |       |       |       |        |        |        |        |        |
| ZKPQ6     | 0.02         | 0.01   | 0.07      | -0.64 | 0.59  | -0.47 | -0.60 | -0.17 |       |       |       |        |        |        |        |        |
| ZKPQ8     | 0.03         | 0.02   | -0.09     | 0.36  | -0.33 | 0.48  | 0.36  | 0.51  | -0.35 |       |       |        |        |        |        |        |
| ZKPQ9     | -0.08        | 0.11   | 0.03      | 0.22  | -0.25 | 0.44  | 0.34  | 0.73  | -0.26 | 0.68  |       |        |        |        |        |        |
| ZKPQ11    | -0.08        | 0.08   | -0.05     | 0.20  | -0.06 | 0.38  | 0.15  | 0.72  | -0.23 | 0.47  | 0.64  |        |        |        |        |        |
| ZKPQ12    | -0.20        | -0.08  | 0.09      | 0.32  | -0.14 | 0.37  | 0.27  | 0.50  | -0.10 | 0.38  | 0.43  | 0.38   |        |        |        |        |
| ZKPQ13    | -0.08        | 0.01   | -0.01     | 0.35  | -0.30 | 0.33  | 0.30  | 0.37  | -0.19 | 0.47  | 0.46  | 0.32   | 0.41   |        |        |        |
| ZKPQ14    | -0.17        | 0.04   | -0.01     | 0.26  | -0.22 | 0.52  | 0.24  | 0.54  | -0.07 | 0.49  | 0.63  | 0.64   | 0.47   | 0.48   |        |        |
| ZKPQ15    | -0.02        | 0.05   | -0.10     | 0.27  | -0.20 | 0.39  | 0.26  | 0.39  | -0.16 | 0.58  | 0.47  | 0.32   | 0.32   | 0.52   | 0.41   |        |
| ZKPQ16    | 0.00         | 0.09   | 0.05      | 0.34  | -0.35 | 0.55  | 0.23  | 0.55  | -0.24 | 0.56  | 0.55  | 0.47   | 0.44   | 0.51   | 0.59   | 0.51   |
| ZKPQ17    | 0.03         | 0.06   | 0.09      | 0.46  | -0.44 | 0.62  | 0.37  | 0.51  | -0.27 | 0.45  | 0.50  | 0.40   | 0.45   | 0.46   | 0.56   | 0.51   |
| ZKPQ18    | -0.16        | 0.07   | 0.00      | 0.59  | -0.63 | 0.84  | 0.52  | 0.42  | -0.44 | 0.49  | 0.55  | 0.42   | 0.34   | 0.45   | 0.62   | 0.41   |
| ZKPQ19    | -0.09        | 0.03   | 0.07      | 0.28  | -0.16 | 0.51  | 0.30  | 0.47  | -0.20 | 0.32  | 0.44  | 0.35   | 0.37   | 0.26   | 0.42   | 0.28   |
| TPQ29     | -0.13        | 0.04   | -0.01     | 0.51  | -0.60 | 0.62  | 0.48  | 0.28  | -0.28 | 0.43  | 0.50  | 0.28   | 0.40   | 0.41   | 0.39   | 0.37   |
| TPQ31     | -0.18        | 0.06   | -0.01     | 0.21  | -0.21 | 0.38  | 0.24  | 0.23  | -0.13 | 0.14  | 0.27  | 0.26   | 0.27   | 0.19   | 0.34   | 0.24   |
| TPQ35     | -0.11        | 0.03   | -0.03     | 0.23  | -0.29 | 0.42  | 0.30  | 0.43  | -0.37 | 0.29  | 0.39  | 0.41   | 0.27   | 0.42   | 0.41   | 0.27   |
| TPQ37     | -0.07        | -0.03  | 0.04      | 0.44  | -0.44 | 0.62  | 0.52  | 0.34  | -0.39 | 0.45  | 0.49  | 0.26   | 0.42   | 0.43   | 0.47   | 0.34   |
| TPQ39     | 0.05         | 0.03   | 0.03      | -0.42 | 0.62  | -0.43 | -0.38 | -0.11 | 0.49  | -0.23 | -0.16 | -0.06  | -0.05  | -0.18  | -0.19  | -0.12  |
| TPQ40     | 0.16         | 0.01   | -0.05     | -0.20 | 0.47  | -0.27 | -0.31 | 0.10  | 0.36  | -0.21 | -0.10 | 0.07   | 0.06   | -0.01  | -0.08  | -0.04  |
| TPQ44     | 0.01         | -0.02  | -0.08     | 0.11  | -0.02 | 0.21  | 0.12  | 0.25  | -0.14 | 0.24  | 0.23  | 0.15   | 0.14   | 0.14   | 0.10   | 0.17   |
| TPQ54     | -0.04        | 0.00   | 0.10      | -0.13 | 0.37  | -0.24 | -0.02 | 0.10  | 0.19  | -0.08 | -0.09 | -0.06  | 0.11   | -0.12  | -0.08  | 0.01   |
| TPQ63     | -0.01        | -0.04  | 0.11      | -0.33 | 0.33  | -0.31 | -0.31 | -0.04 | 0.53  | -0.22 | -0.11 | -0.06  | 0.02   | -0.20  | -0.07  | -0.07  |
| SES       | -0.05        | -0.02  | 0.15      | -0.11 | 0.03  | -0.04 | 0.00  | 0.04  | 0.09  | -0.05 | -0.05 | -0.05  | 0.06   | -0.01  | -0.05  | -0.09  |
| GENDER    | 0.54         | 0.01   | 0.13      | 0.14  | -0.03 | 0.09  | 0.19  | 0.12  | -0.10 | 0.29  | 0.28  | 0.24   | 0.02   | 0.02   | 0.18   | 0.22   |

ZKPQ16 ZKPQ17 ZKPQ18 ZKPQ19 TPQ29 TPQ31 TPQ35 TPQ37 TPQ39 TPQ40 TPQ44 TPQ54 TPQ63 SES

|       |       |       |       |       |       |       |       |       |      |       |      |       |       |  |
|-------|-------|-------|-------|-------|-------|-------|-------|-------|------|-------|------|-------|-------|--|
| 0.69  |       |       |       |       |       |       |       |       |      |       |      |       |       |  |
| 0.61  | 0.75  |       |       |       |       |       |       |       |      |       |      |       |       |  |
| 0.46  | 0.45  | 0.50  |       |       |       |       |       |       |      |       |      |       |       |  |
| 0.55  | 0.65  | 0.62  | 0.36  |       |       |       |       |       |      |       |      |       |       |  |
| 0.25  | 0.40  | 0.42  | 0.35  | 0.48  |       |       |       |       |      |       |      |       |       |  |
| 0.45  | 0.45  | 0.49  | 0.36  | 0.44  | 0.37  |       |       |       |      |       |      |       |       |  |
| 0.42  | 0.56  | 0.57  | 0.31  | 0.61  | 0.25  | 0.49  |       |       |      |       |      |       |       |  |
| -0.23 | -0.39 | -0.42 | -0.18 | -0.49 | -0.24 | -0.20 | -0.42 |       |      |       |      |       |       |  |
| -0.05 | -0.09 | -0.22 | -0.04 | -0.22 | -0.23 | 0.01  | -0.09 | 0.67  |      |       |      |       |       |  |
| 0.28  | 0.27  | 0.31  | 0.26  | 0.28  | 0.36  | 0.23  | 0.19  | 0.04  | 0.00 |       |      |       |       |  |
| -0.04 | 0.00  | -0.13 | -0.05 | -0.03 | -0.05 | -0.08 | -0.22 | 0.36  | 0.38 | 0.03  |      |       |       |  |
| -0.21 | -0.26 | -0.28 | -0.27 | -0.23 | -0.19 | -0.16 | -0.34 | 0.58  | 0.46 | -0.13 | 0.31 |       |       |  |
| -0.02 | -0.02 | -0.03 | 0.02  | -0.03 | -0.10 | 0.02  | 0.04  | -0.02 | 0.09 | -0.16 | 0.06 | 0.11  |       |  |
| 0.31  | 0.09  | 0.09  | 0.23  | 0.04  | 0.12  | 0.03  | 0.09  | 0.00  | 0.04 | 0.27  | 0.01 | -0.06 | -0.13 |  |

Add Health

|          | sexual abuse | gender | SES   | Age   | gut   | risk  | fore  | fcrowd | conform | conscie | reliab | risk2_h | tact  | agg   | gentle | cnvntnl |
|----------|--------------|--------|-------|-------|-------|-------|-------|--------|---------|---------|--------|---------|-------|-------|--------|---------|
| gender   | 0.08         |        |       |       |       |       |       |        |         |         |        |         |       |       |        |         |
| SES      | -0.02        | 0.01   |       |       |       |       |       |        |         |         |        |         |       |       |        |         |
| Age      | 0.01         | -0.04  | 0.02  |       |       |       |       |        |         |         |        |         |       |       |        |         |
| gut      | -0.08        | 0.06   | 0.02  | 0.03  |       |       |       |        |         |         |        |         |       |       |        |         |
| risk     | -0.03        | 0.22   | 0.00  | 0.03  | 0.23  |       |       |        |         |         |        |         |       |       |        |         |
| fore     | -0.06        | 0.07   | -0.01 | 0.02  | 0.28  | 0.22  |       |        |         |         |        |         |       |       |        |         |
| fcrowd   | -0.01        | 0.01   | -0.01 | 0.03  | 0.14  | 0.15  | 0.08  |        |         |         |        |         |       |       |        |         |
| conform  | -0.04        | 0.04   | -0.02 | -0.04 | 0.15  | 0.04  | 0.23  | -0.07  |         |         |        |         |       |       |        |         |
| conscie  | -0.03        | 0.11   | 0.07  | 0.03  | 0.20  | 0.00  | 0.16  | -0.03  | 0.10    |         |        |         |       |       |        |         |
| reliab   | -0.11        | 0.16   | 0.03  | -0.01 | 0.15  | 0.05  | 0.18  | -0.07  | 0.12    | 0.42    |        |         |       |       |        |         |
| risk2_h  | 0.01         | -0.15  | 0.02  | -0.08 | -0.14 | -0.61 | -0.11 | -0.10  | 0.00    | 0.12    | 0.13   |         |       |       |        |         |
| tact     | -0.06        | 0.10   | 0.02  | -0.01 | 0.06  | -0.04 | 0.11  | -0.02  | 0.05    | 0.30    | 0.33   | 0.18    |       |       |        |         |
| agg      | -0.03        | -0.09  | -0.07 | -0.05 | -0.07 | -0.21 | 0.03  | -0.12  | 0.01    | 0.06    | 0.09   | 0.33    | 0.24  |       |        |         |
| gentle   | -0.16        | 0.19   | 0.07  | 0.02  | 0.10  | 0.03  | 0.12  | -0.08  | 0.05    | 0.28    | 0.40   | 0.12    | 0.42  | 0.04  |        |         |
| cnvntnl  | -0.08        | 0.09   | 0.02  | 0.00  | 0.03  | -0.04 | 0.10  | -0.02  | 0.05    | 0.26    | 0.30   | 0.12    | 0.48  | 0.15  | 0.48   |         |
| qperty   | -0.02        | 0.17   | -0.05 | 0.08  | 0.10  | 0.22  | 0.10  | 0.00   | 0.02    | 0.10    | 0.12   | -0.21   | -0.01 | -0.17 | 0.13   | 0.07    |
| expseek  | -0.03        | -0.17  | 0.00  | -0.06 | -0.06 | -0.23 | -0.07 | -0.02  | -0.01   | 0.00    | -0.08  | 0.26    | -0.02 | 0.12  | -0.12  | -0.05   |
| date_v   | -0.02        | 0.22   | -0.02 | 0.04  | 0.07  | 0.15  | 0.10  | 0.01   | -0.01   | 0.10    | 0.08   | -0.14   | 0.01  | -0.15 | 0.10   | 0.03    |
| td_mrrg  | -0.01        | 0.12   | -0.05 | -0.03 | 0.06  | 0.16  | 0.09  | 0.04   | 0.01    | 0.04    | 0.06   | -0.15   | 0.03  | -0.07 | 0.08   | 0.05    |
| jetset   | -0.03        | -0.02  | -0.01 | 0.01  | 0.04  | -0.04 | 0.00  | 0.04   | -0.03   | 0.01    | 0.02   | 0.08    | 0.11  | 0.11  | 0.01   | -0.01   |
| thrill   | 0.07         | -0.19  | -0.02 | -0.08 | -0.12 | -0.33 | -0.14 | -0.04  | -0.07   | -0.09   | -0.11  | 0.30    | 0.09  | 0.18  | -0.04  | -0.01   |
| excit    | 0.04         | -0.21  | -0.01 | -0.11 | -0.16 | -0.32 | -0.17 | -0.06  | -0.06   | -0.05   | -0.08  | 0.31    | 0.05  | 0.17  | -0.04  | -0.03   |
| glib     | 0.04         | -0.23  | -0.01 | -0.13 | -0.08 | -0.20 | -0.09 | -0.05  | -0.05   | -0.03   | -0.04  | 0.21    | 0.05  | 0.17  | -0.04  | 0.02    |
| whim     | 0.06         | -0.11  | 0.03  | -0.09 | -0.22 | -0.25 | -0.17 | -0.14  | -0.04   | -0.05   | -0.05  | 0.28    | 0.02  | 0.15  | 0.00   | -0.05   |
| lctrl    | 0.13         | -0.15  | 0.01  | -0.06 | -0.19 | -0.18 | -0.16 | -0.03  | -0.12   | -0.10   | -0.09  | 0.23    | 0.07  | 0.22  | -0.03  | -0.03   |
| lax      | 0.05         | -0.19  | -0.01 | -0.12 | -0.18 | -0.26 | -0.17 | -0.03  | -0.07   | -0.07   | -0.09  | 0.31    | -0.01 | 0.14  | -0.07  | -0.07   |
| instinct | 0.09         | -0.17  | 0.01  | -0.07 | -0.42 | -0.27 | -0.25 | -0.06  | -0.10   | -0.15   | -0.14  | 0.27    | -0.01 | 0.19  | -0.06  | -0.08   |
| struth   | 0.06         | -0.24  | -0.02 | -0.11 | -0.17 | -0.18 | -0.15 | -0.01  | -0.08   | -0.13   | -0.14  | 0.18    | -0.01 | 0.16  | -0.07  | -0.05   |
| c_intrst | 0.10         | -0.14  | 0.01  | -0.08 | -0.24 | -0.18 | -0.23 | 0.00   | -0.18   | -0.18   | -0.18  | 0.15    | -0.06 | 0.17  | -0.10  | -0.12   |

qperty expseek date\_v td\_mrrg jetset thrill excit glib whim lctrl lax instinct struth

|       |       |       |       |      |      |      |      |      |      |      |      |      |
|-------|-------|-------|-------|------|------|------|------|------|------|------|------|------|
| -0.26 |       |       |       |      |      |      |      |      |      |      |      |      |
| 0.32  | -0.20 |       |       |      |      |      |      |      |      |      |      |      |
| 0.23  | -0.24 | 0.28  |       |      |      |      |      |      |      |      |      |      |
| -0.11 | 0.14  | -0.13 | -0.11 |      |      |      |      |      |      |      |      |      |
| -0.24 | 0.38  | -0.19 | -0.20 | 0.12 |      |      |      |      |      |      |      |      |
| -0.26 | 0.28  | -0.21 | -0.15 | 0.13 | 0.57 |      |      |      |      |      |      |      |
| -0.17 | 0.20  | -0.19 | -0.15 | 0.10 | 0.37 | 0.44 |      |      |      |      |      |      |
| -0.21 | 0.21  | -0.17 | -0.15 | 0.07 | 0.40 | 0.48 | 0.40 |      |      |      |      |      |
| -0.19 | 0.16  | -0.16 | -0.15 | 0.05 | 0.37 | 0.41 | 0.34 | 0.39 |      |      |      |      |
| -0.27 | 0.26  | -0.23 | -0.18 | 0.09 | 0.39 | 0.42 | 0.35 | 0.44 | 0.44 |      |      |      |
| -0.21 | 0.20  | -0.16 | -0.16 | 0.04 | 0.38 | 0.35 | 0.30 | 0.43 | 0.47 | 0.50 |      |      |
| -0.19 | 0.18  | -0.18 | -0.13 | 0.09 | 0.29 | 0.34 | 0.56 | 0.38 | 0.38 | 0.39 | 0.41 |      |
| -0.19 | 0.18  | -0.16 | -0.12 | 0.06 | 0.35 | 0.39 | 0.33 | 0.40 | 0.47 | 0.43 | 0.51 | 0.50 |
